# Supplementary material for: Severity of Hepatocyte Damage and Prognosis in Cirrhotic Patients Correlate with Hepatocyte Magnesium Depletion
Source: MDPI journal article supplement (doi:10.3390/nu15112626), 2023-06-03
Supplement: s1 [file s1]

**Supplementary table S2.** Demographic and clinical characteristics of the cirrhotic patients of the study populations A and B, subgrouped according to the respective median value of serum AST activity.

|                                            | Cirrhotics of the study<br>population A with low<br>serum AST | Cirrhotics of the study<br>population A with high<br>serum AST | P value          | Cirrhotics of the study<br>population B with low<br>serum AST | Cirrhotics of the study<br>population B with high<br>serum AST | P value          |
|--------------------------------------------|---------------------------------------------------------------|----------------------------------------------------------------|------------------|---------------------------------------------------------------|----------------------------------------------------------------|------------------|
| Age, median (IQR)                          | 55.0 (48.0-61.0)                                              | 50.5 (47.3-57.8)                                               | 0.519            | 60.0 (55.6-63.8)                                              | 54.9 (50.1-60.2)                                               | 0.054            |
| Sex, male, n (%)                           | 11 (84.6)                                                     | 11 (78.6)                                                      | 1                | 13 (86.7)                                                     | 14 (87.5)                                                      | 1                |
| BMI (Kg/m <sup>2</sup> ), median (IQR)     | 23.1 (22.6-29.6)                                              | 24.8 (23.3-27.4)                                               | 0.488            | 25.9 (24.4-29.8)                                              | 25.5 (23.5-27.6)                                               | 0.572            |
| Cirrhosis aetiology, n (%):                |                                                               |                                                                |                  |                                                               |                                                                |                  |
| MAFLD                                      | 7 (53.8)                                                      | 9 (64.3)                                                       | 0.704            | 9 (60)                                                        | 8 (50)                                                         | 0.576            |
| Alcohol                                    | 6 (46.2)                                                      | 4 (28.6)                                                       | 0.440            | 6 (40)                                                        | 10 (62.5)                                                      | 0.210            |
| Viral                                      | 8 (61.5)                                                      | 11 (78.6)                                                      | 0.420            | 4 (26.7)                                                      | 8 (50.0)                                                       | 0.273            |
| HCC, n (%)                                 | 9 (69.2)                                                      | 5 (35.7)                                                       | 0.128            | 11 (73.3)                                                     | 6 (37.5)                                                       | 0.073            |
| Diuretic treatment, n (%):                 |                                                               |                                                                |                  |                                                               |                                                                |                  |
| No                                         | 5 (38.5)                                                      | 3 (21.4)                                                       | 0.637            | 4 (26.7)                                                      | 7 (43.8)                                                       | 0.102            |
| K sparing diuretics only                   | 7 (53.8)                                                      | 9 (64.3)                                                       |                  | 4 (26.7)                                                      | 0 (0)                                                          |                  |
| Loop diuretics plus K sparing<br>diuretics | 1 (7.7)                                                       | 2 (14.3)                                                       |                  | 7 (46.7)                                                      | 9 (56.3)                                                       |                  |
| MELDNa, median (IQR)                       | 14.0 (11.2-22.0)                                              | 19.0 (17.8-22.3)                                               | 0.054            | 14.0 (10.0-18.0)                                              | 24.0 (14.8-27.8)                                               | <b>0.006</b>     |
| Serum AST (IU/L), median (IQR)             | 40.0 (30.0-44.0)                                              | 98.0 (76.8-115.3)                                              | <b>&lt;0.001</b> | 33.0 (28.0-46.0)                                              | 97.0 (72.8-139.8)                                              | <b>&lt;0.001</b> |
| Serum ALT (IU/L), median, (IQR)            | 30.0 (24.0-37.5)                                              | 59.5 (50.0-100.0)                                              | <b>&lt;0.001</b> | 25.0 (20.0-37.0)                                              | 61.0 (44.3-84.8)                                               | <b>&lt;0.001</b> |
| Serum Mg, mg/dL, median (IQR)              | NAV                                                           | NAV                                                            | -                | 1.90 (1.70-2.11)                                              | 1.90 (1.61-1.94)                                               | 0.358            |
| Tissue Mg, (µg/g), median, (IQR) *         | 118.7 (114.3-140.6)                                           | 114.1 (106.9-125.8)                                            | 0.220            | NAV                                                           | NAV                                                            | -                |
