# Supplementary material for: Severity of Hepatocyte Damage and Prognosis in Cirrhotic Patients Correlate with Hepatocyte Magnesium Depletion
Source: MDPI journal article supplement (doi:10.3390/nu15112626), 2023-06-03
Supplement: s1 [file s1]

**Supplementary table S1.** Demographic and clinical characteristics of the cirrhotic patients of the study populations A and B, subgrouped according to the respective median of MELDNa

|                                                                          | Cirrhotics of the study population A with low MELDNa | Cirrhotics of the study population A with high MELDNa | P value |  | Cirrhotics of the study population B with low MELDNa | Cirrhotics of the study population B with high MELDNa | P value |
|--------------------------------------------------------------------------|------------------------------------------------------|-------------------------------------------------------|---------|--|------------------------------------------------------|-------------------------------------------------------|---------|
| Age, median (IQR)                                                        | 55.5<br>(48.2-62)                                    | 51<br>(45-56)                                         | 0.200   |  | 55.7<br>(52.3-63.8)                                  | 57.7<br>(52-61.9)                                     | 0.861   |
| Sex, male, n (%)                                                         | 10 (83.3)                                            | 12 (80)                                               | 1       |  | 14 (93.3)                                            | 13 (81.3)                                             | 0.600   |
| BMI (Kg/m <sup>2</sup> ), median (IQR)                                   | 23.2<br>(22.6-30.6)                                  | 24.4<br>(23-26.9)                                     | 0.755   |  | 25.1<br>(24.4-29)                                    | 26.7<br>(23.5-28.9)                                   | 0.572   |
| Cirrhosis aetiology, n (%):                                              |                                                      |                                                       |         |  |                                                      |                                                       |         |
| MAFLD                                                                    | 7 (58.3)                                             | 9 (60)                                                | 1       |  | 7 (46.6)                                             | 10 (62.5)                                             | 0.376   |
| Alcohol                                                                  | 5 (41.6)                                             | 5 (33.3)                                              | 0.706   |  | 8 (53.3)                                             | 8 (50)                                                | 0.853   |
| Viral                                                                    | 9 (75)                                               | 10 (66.6)                                             | 0.696   |  | 6 (40)                                               | 6 (37.5)                                              | 0.886   |
| HCC, n (%)                                                               | 11 (91.6)                                            | 3 (20)                                                | <0.001  |  | 15 (100)                                             | 2 (12.5)                                              | <0.001  |
| Diuretic treatment, n (%):                                               |                                                      |                                                       | 0.031   |  |                                                      |                                                       | 0.001   |
| No                                                                       | 6 (50)                                               | 2 (13.3)                                              |         |  | 8 (53.3)                                             | 3 (35.5)                                              |         |
| K sparing diuretics only                                                 | 4 (33.3)                                             | 12 (80.0)                                             |         |  | 4 (26.7)                                             | 4 (12.9)                                              |         |
| Loop diuretics plus K sparing diuretics.                                 | 2 (6.7)                                              | 1 (6.7)                                               |         |  | 3 (20.0)                                             | 16 (51.6)                                             |         |
| MELDNa, median (IQR)                                                     | 13.5 (11-15)                                         | 20 (19-27.8)                                          | <0.001  |  | 12 (8-14)                                            | 22 (22.3-28.8)                                        | <0.001  |
| Serum AST (IU/L), median (IQR)                                           | 41(29-70)                                            | 90 (47-112)                                           | 0.007   |  | 35 (29-72)                                           | 84.5 (56.8-139.5)                                     | 0.005   |
| Serum ALT (IU/L), median, (IQR)                                          | 37.5 (30.5-57)                                       | 51 (25-76)                                            | 0.456   |  | 36 (23-58)                                           | 53.5 (33.3-82)                                        | 0.119   |
| Serum Mg, mg/dL, median (IQR)                                            | NAV                                                  | NAV                                                   | -       |  | 1.9 (1.7-2.1)                                        | 1.9 (1.6-1.94)                                        | 0.318   |
| Tissue Mg, (µg/g), median, (IQR) *                                       | 125.8 (116.8-141.1)                                  | 113.2 (101.7-123.2)                                   | 0.005   |  | NAV                                                  | NAV                                                   | -       |
| Percentage of weak positive hepatocytes to TRPM7 stain, median (IQR)     | NAV                                                  | NAV                                                   | -       |  | 46.4 (26.4-54.2)                                     | 50.6 (36.3-57.8)                                      | 0.247   |
| Percentage of intense positive hepatocytes to TRPM7 stain, median, (IQR) | NAV                                                  | NAV                                                   | -       |  | 0.8 (0-1.8)                                          | 9 (3.8-17.3)                                          | <0.001  |
| Percentage of total positive hepatocytes to                              | NAV                                                  | NAV                                                   | -       |  | 47.2 (24.8-55)                                       | 55.9 (51.5-75.7)                                      | 0.014   |
