# Supplementary material for: Severity of Hepatocyte Damage and Prognosis in Cirrhotic Patients Correlate with Hepatocyte Magnesium Depletion
Source: MDPI journal article supplement (doi:10.3390/nu15112626), 2023-06-03
Supplement: s1 [file s1]

**Supplementary table S3.** Demographic and clinical characteristics of the cirrhotic patients of the study populations A and B, subgrouped according to the respective median value of  $\Delta$ -MELDNa during the waitlist time

|                                          | Cirrhotics of the study<br>population A with low<br>$\Delta$ -MELDNa | Cirrhotics of the study<br>population A with high<br>$\Delta$ -MELDNa | P value      | Cirrhotics of the study<br>population B with low<br>$\Delta$ -MELDNa | Cirrhotics of the study<br>population B with high<br>$\Delta$ -MELDNa | P value          |
|------------------------------------------|----------------------------------------------------------------------|-----------------------------------------------------------------------|--------------|----------------------------------------------------------------------|-----------------------------------------------------------------------|------------------|
| Age, median (IQR)                        | 51.0 (45.0-59.0)                                                     | 54.0 (49.0-60.8)                                                      | 0.239        | 56.5 (52.3-60.3)                                                     | 59.1 (52.1-63.7)                                                      |                  |
| Male sex, n (%)                          | 10 (76.9)                                                            | 12 (85.7)                                                             | 0.648        | 12 (80.0)                                                            | 15 (93.8)                                                             |                  |
| BMI (Kg/m <sup>2</sup> ), median (IQR)   | 24.1 (22.6-28.4)                                                     | 24.3 (22.9-26.7)                                                      | 0.943        | 25.9 (24.0-29.7)                                                     | 25.7 (24.5-28.7)                                                      |                  |
| Cirrhosis aetiology, n (%):              |                                                                      |                                                                       |              |                                                                      |                                                                       |                  |
| MAFLD                                    | 7 (53.8)                                                             | 9 (64.3)                                                              | 0.704        | 9 (60.0)                                                             | 8 (50.0)                                                              | 0.576            |
| Alcohol                                  | 5 (38.5)                                                             | 5 (35.7)                                                              | 1            | 10 (66.7)                                                            | 6 (37.5)                                                              | 0.156            |
| Viral                                    | 9 (69.2)                                                             | 10 (71.4)                                                             | 1            | 4 (26.7)                                                             | 8 (50.0)                                                              | 0.273            |
| HCC, n (%)                               | 8 (61.5)                                                             | 6 (42.9)                                                              | 0.449        | 9 (60.0)                                                             | 8 (50.0)                                                              | 0.576            |
| Diuretic treatment, n (%):               |                                                                      |                                                                       |              |                                                                      |                                                                       |                  |
| No                                       | 4 (30.8)                                                             | 4 (28.6)                                                              | 0.331        | 5 (33.3)                                                             | 6 (37.5)                                                              | 0.621            |
| K sparing diuretics only                 | 0 (0)                                                                | 3 (21.4)                                                              |              | 1 (6.7)                                                              | 3 (18.8)                                                              |                  |
| Loop diuretics plus K sparing diuretics  | 9 (69.2)                                                             | 7 (50.0)                                                              |              | 9 (60.0)                                                             | 7 (43.8)                                                              |                  |
| MELDNa at transplant, median (IQR)       | 16.0 (12.2-23.0)                                                     | 19.0 (14.8-21.8)                                                      | 0.402        | 14.0 (10.0-23.0)                                                     | 22.0 (14.0-28.8)                                                      | <b>&lt;0.001</b> |
| MELDNa at listing, median (IQR)          | 15.9 (12.2-25.7)                                                     | 14.6 (11.4-17.8)                                                      | 0.280        | 15.9 (12.8-22.5)                                                     | 17.6 (9.8-28.8)                                                       | 0.830            |
| $\Delta$ -MELDNa, median (IQR)           | 0.0 (-1.31 – 0.0)                                                    | 1.09 (0.24-3.51)                                                      | 0.059        | -0.31 (-1.84-0.08)                                                   | 3.23 (1.34-10.83)                                                     | <b>&lt;0.001</b> |
| Serum AST (IU/L), median (IQR)           | 41.0 (35.5-70.0)                                                     | 88.0 (58.5-115.3)                                                     | <b>0.009</b> | 43.0 (28.0-59.0)                                                     | 93.0 (61.0-139.5)                                                     | <b>0.001</b>     |
| Serum ALT (IU/L), median, (IQR)          | 32.0 (24.5-59.0)                                                     | 51.0 (43.5-95.3)                                                      | 0.089        | 29.0 (20.0-48.0)                                                     | 59.5 (36.3-84.8)                                                      | <b>0.002</b>     |
| Serum Mg, mg/dL, median (IQR)            | NAV                                                                  | NAV                                                                   | -            | 1.90 (1.70-2.11)                                                     | 1.75 (1.63-1.94)                                                      | 0.188            |
| Tissue Mg, ( $\mu$ g/g), median, (IQR) * | 118.7 (113.3-140.6)                                                  | 114.7 (102.8-125.8)                                                   | 0.280        | NAV                                                                  | NAV                                                                   |                  |

|                                                                                                                                                                                                                                                                                                                                                                                                                                                                                                                          |     |     |   |                  |                  |              |
|--------------------------------------------------------------------------------------------------------------------------------------------------------------------------------------------------------------------------------------------------------------------------------------------------------------------------------------------------------------------------------------------------------------------------------------------------------------------------------------------------------------------------|-----|-----|---|------------------|------------------|--------------|
| Percentage of weak positive hepatocytes to TRPM7 stain, median (IQR)                                                                                                                                                                                                                                                                                                                                                                                                                                                     | NAV | NAV | - | 42.8 (24.6-56.2) | 50.2 (40.7-56.3) | 0.299        |
| Percentage of intense positive hepatocytes to TRPM7 stain, median, (IQR)                                                                                                                                                                                                                                                                                                                                                                                                                                                 | NAV | NAV | - | 0.6 (0.0-4.0)    | 7.0 (1.8-17.3)   | <b>0.001</b> |
| Percentage of total positive hepatocytes to TRPM7 stain, median (IQR)                                                                                                                                                                                                                                                                                                                                                                                                                                                    | NAV | NAV | - | 46.8 (24.8-56.2) | 55.4 (50.9-73.6) | 0.045        |
| <p><b>* Measured by atomic absorption. All data refer to the time of liver transplant, unless otherwise specified</b></p> <p><b>Abbreviation: AST aspartate amino transferase; ALT alanine amino transferase; BMI: body mass index; HCC, hepatocellular carcinoma; IQR, interquartile range; K, potassium; MAFLD, metabolic associated fatty liver disease; MELD, model of end stage liver disease; MELDNa, MELD with added a serum sodium concentration parameter; Mg, magnesium; NAV, not available; Δ, delta.</b></p> |     |     |   |                  |                  |              |
